# Supplementary material
Source: PubMed Central journal article supplement (PMC10130945)
Supplement: jama-e231207-s002.pdf [file jama-e231207-s002.pdf]

## **Data Sharing Statement**

### **Data**

**Data available:** No

### **Additional Information**

**Explanation for why data not available:** The IQVIA data are proprietary and cannot be distributed.
